# Supplementary material for: Assessment of Second-Opinion Strategies for Diagnoses of Cutaneous Melanocytic Lesions
Source: PubMed Central journal article supplement (PMC6804025; doi:10.1001/jamanetworkopen.2019.12597), 2019-10-11
Supplement: jamanetwopen-2-e1912597-s001.pdf [file jamanetwopen-2-e1912597-s001.pdf]

## Supplementary Online Content

Piepkorn MW, Longton GM, Reisch LM, et al. Assessment of second-opinion strategies for diagnoses of cutaneous melanocytic lesions. *JAMA Netw Open*. 2019;2(10):e1912597. doi:10.1001/jamanetworkopen.2019.12597

**eTable 1.** Summary of Strategies Evaluated for Obtaining Second Opinion

**eTable 2.** Six Second Opinion Strategies Based on Initial Interpretation: Percentage Requiring Second and Third Opinions

**eTable 3.** Four Second Opinion Strategies Based on Primary and Consulting Pathologists' Experience: Percentage Requiring Third Opinions

This supplementary material has been provided by the authors to give readers additional information about their work.

|                                                                                                                                                                                                                                                 |
|-------------------------------------------------------------------------------------------------------------------------------------------------------------------------------------------------------------------------------------------------|
| <b>eTable 1.</b> Summary of Strategies Evaluated for Obtaining Second Opinion                                                                                                                                                                   |
| <b>Strategy 1. Second opinion is applied to all skin biopsy cases</b>                                                                                                                                                                           |
| <b>Second opinion obtained only if:</b>                                                                                                                                                                                                         |
| Strategy 2. initial interpretations considered pT1b melanoma or greater (M-Path category V)                                                                                                                                                     |
| Strategy 3. initial interpretations considered melanoma pT1a or pT1b or greater (M-Path category IV or V)                                                                                                                                       |
| Strategy 4. initial interpretations considered melanoma in situ or invasive melanoma (M-Path categories III MIS only, IV and V)                                                                                                                 |
| Strategy 5. initial pathologist desires a second opinion                                                                                                                                                                                        |
| Strategy 6. initial pathologist desires a second opinion or if it would be required by policy                                                                                                                                                   |
| <b>Evaluation restricted to cases read by initial pathologists with <u>no</u> board certification or fellowship training in dermatopathology (i.e., general pathologist):</b>                                                                   |
| Strategy 7. with 2 <sup>nd</sup> and 3 <sup>rd</sup> brought in from another pathologist with no board certification or fellowship training in dermatopathology                                                                                 |
| Strategy 8. with 2 <sup>nd</sup> brought in from another pathologist with no board certification or fellowship training in dermatopathology, and 3 <sup>rd</sup> brought in from a board-certified and/or fellowship trained dermatopathologist |
| Strategy 9. with 2 <sup>nd</sup> and 3 <sup>rd</sup> brought in from a dermatopathologist with board certification and/or fellowship training in dermatopathology                                                                               |
| <b>Evaluation restricted to cases read by initial dermatopathologists with board certification and/or fellowship training in dermatopathology:</b>                                                                                              |
| Strategy 10. with 2 <sup>nd</sup> and 3 <sup>rd</sup> brought in from a dermatopathologist with board certification and/or fellowship training in dermatopathology                                                                              |

**eTable 2.** Six Second Opinion Strategies Based on Initial Interpretation: Percentage Requiring Second and Third Opinions

| Strategy                                                                 | Rate, %                              |                            |                               |                    |                              | Overall |
|--------------------------------------------------------------------------|--------------------------------------|----------------------------|-------------------------------|--------------------|------------------------------|---------|
|                                                                          | M-Path Reference Consensus Diagnosis |                            |                               |                    |                              |         |
|                                                                          | Benign (I)                           | Moderately Dysplastic (II) | Severely Dysplastic/MIS (III) | pT1a melanoma (IV) | pT1b melanoma or greater (V) |         |
| <b>SECOND OPINION APPLIED TO ALL CASES</b>                               |                                      |                            |                               |                    |                              |         |
| <b>Strategy 1</b>                                                        |                                      |                            |                               |                    |                              |         |
| % requiring 2 <sup>nd</sup> opinion                                      | 100.0                                | 100.0                      | 100.0                         | 100.0              | 100.0                        | 100.00  |
| % requiring 3 <sup>rd</sup> opinion                                      | 13.4                                 | 45.6                       | 56.6                          | 59.4               | 33.5                         | 45.2    |
| <b>CRITERION FOR OBTAINING SECOND OPINION BASED ON INITIAL DIAGNOSIS</b> |                                      |                            |                               |                    |                              |         |
| <b>Strategy 2. (Initial t1b)</b>                                         |                                      |                            |                               |                    |                              |         |
| % requiring 2 <sup>nd</sup> opinion                                      | 0.1                                  | 0.8                        | 0.5                           | 9.1                | 72.1                         | 20.8    |
| % requiring 3 <sup>rd</sup> opinion                                      | 0.1                                  | 0.8                        | 0.5                           | 7.0                | 12.8                         | 5.2     |
| <b>Strategy 3. (Initial t1a or t1b)</b>                                  |                                      |                            |                               |                    |                              |         |
| % requiring 2 <sup>nd</sup> opinion                                      | 0.4                                  | 2.8                        | 5.5                           | 51.9               | 86.2                         | 36.3    |
| % requiring 3 <sup>rd</sup> opinion                                      | 0.4                                  | 2.5                        | 4.9                           | 27.9               | 21.8                         | 13.9    |

| Strategy                                                                                 | Rate, %                              |                            |                               |                    |                              | Overall |
|------------------------------------------------------------------------------------------|--------------------------------------|----------------------------|-------------------------------|--------------------|------------------------------|---------|
|                                                                                          | M-Path Reference Consensus Diagnosis |                            |                               |                    |                              |         |
|                                                                                          | Benign (I)                           | Moderately Dysplastic (II) | Severely Dysplastic/MIS (III) | pT1a melanoma (IV) | pT1b melanoma or greater (V) |         |
| <b>Strategy 4. (initial MIS, t1a or t1b)</b>                                             |                                      |                            |                               |                    |                              |         |
| % requiring 2 <sup>nd</sup> opinion                                                      | 0.5                                  | 4.6                        | 27.5                          | 69.1               | 87.1                         | 46.5    |
| % requiring 3 <sup>rd</sup> opinion                                                      | 0.5                                  | 4.0                        | 12.9                          | 36.2               | 22.6                         | 18.4    |
| <b>SECOND OPINION ONLY OBTAINED FOR CASES WHEN DESIRED OR REQUIRED BY POLICY OR BOTH</b> |                                      |                            |                               |                    |                              |         |
| <b>Strategy 5. (second opinion desired)</b>                                              |                                      |                            |                               |                    |                              |         |
| % requiring 2 <sup>nd</sup> opinion                                                      | 17.1                                 | 33.0                       | 48.8                          | 56.3               | 42.9                         | 43.4    |
| % requiring 3 <sup>rd</sup> opinion                                                      | 5.6                                  | 19.9                       | 28.8                          | 35.4               | 20.1                         | 24.4    |
| <b>Strategy 6. (policy or desired)</b>                                                   |                                      |                            |                               |                    |                              |         |
| % requiring 2 <sup>nd</sup> opinion                                                      | 21.0                                 | 40.7                       | 64.6                          | 78.9               | 74.2                         | 62.4    |
| % requiring 3 <sup>rd</sup> opinion                                                      | 6.4                                  | 24.2                       | 37.2                          | 47.6               | 27.5                         | 32.1    |

**eTable 3.** Four Second Opinion Strategies Based on Primary and Consulting Pathologists' Experience: Percentage Requiring Third Opinions

| Strategy                                                                                                         | Rate, %                              |                            |                               |                    |                              | Overall |
|------------------------------------------------------------------------------------------------------------------|--------------------------------------|----------------------------|-------------------------------|--------------------|------------------------------|---------|
|                                                                                                                  | M-Path Reference Consensus Diagnosis |                            |                               |                    |                              |         |
|                                                                                                                  | Benign (I)                           | Moderately Dysplastic (II) | Severely Dysplastic/MIS (III) | pT1a melanoma (IV) | pT1b melanoma or greater (V) |         |
| <b>Strategy 7. (1<sup>st</sup>, 2<sup>nd</sup> &amp; 3<sup>rd</sup> general pathologists)</b>                    |                                      |                            |                               |                    |                              |         |
| % requiring 3 <sup>rd</sup> opinion                                                                              | 12.0                                 | 39.3                       | 51.9                          | 62.2               | 36.3                         | 44.4    |
| <b>Strategy 8. (1 and 2<sup>nd</sup> general pathologists, 3<sup>rd</sup> dermatopathologists)</b>               |                                      |                            |                               |                    |                              |         |
| % requiring 3 <sup>rd</sup> opinion                                                                              | 12.0                                 | 39.3                       | 51.9                          | 62.2               | 36.3                         | 44.4    |
| <b>Strategy 9. (1<sup>st</sup> general pathologist, 2<sup>nd</sup> &amp; 3<sup>rd</sup> dermatopathologists)</b> |                                      |                            |                               |                    |                              |         |
| % requiring 3 <sup>rd</sup> opinion                                                                              | 14.0                                 | 48.3                       | 61.4                          | 60.6               | 33.2                         | 47.1    |
| <b>Strategy 10. (1<sup>st</sup>, 2<sup>nd</sup> &amp; 3<sup>rd</sup> dermatopathologists)</b>                    |                                      |                            |                               |                    |                              |         |
| % requiring 3 <sup>rd</sup> opinion                                                                              | 15.2                                 | 51.7                       | 52.3                          | 48.5               | 27.8                         | 41.2    |
